# Supplementary material for: A cross sectional study exploring the relationship of self-reported physical activity with function, kinesiophobia, self-efficacy and quality of life in an Asian population seeking care for knee osteoarthritis
Source: Springer Nature journal article supplement (doi:10.1186/s12891-024-07181-y), 2024-01-18
Supplement: MOESM1 [file 26639918]

**Additional file 1**

**Table S1.** Summarised participant characteristics and UCLA data for all participants

| Characteristics   |            | UCLA activity score, median (IQR) | UCLA in category, n (%) |            |           |           |           |
|-------------------|------------|-----------------------------------|-------------------------|------------|-----------|-----------|-----------|
|                   |            |                                   | Inactive                | Low        | Moderate  | High      | Very high |
| Overall           |            | 4 (3, 5)                          | 46 (10.8)               | 265 (62.5) | 92 (21.7) | 16 (3.8)  | 5 (1.2)   |
| Age               | ≤ 54       | 4 (3, 5)                          | 6 (13.0)                | 35 (13.2)  | 9 (9.8)   | 3 (18.8)  | 4 (80.0)  |
|                   | 55-64      | 4 (3, 4)                          | 24 (52.2)               | 115 (43.4) | 36 (39.1) | 8 (50.0)  | 1 (20.0)  |
|                   | 65-74      | 4 (3, 5)                          | 7 (15.2)                | 90 (34.0)  | 40 (43.5) | 5 (31.3)  | 0 (0.0)   |
|                   | ≥75        | 2 (3, 4)                          | 9 (19.6)                | 25 (9.4)   | 7 (7.6)   | 0 (0.0)   | 0 (0.0)   |
| Gender            | Male       | 4 (3, 5)                          | 10 (21.7)               | 73 (27.7)  | 37 (40.2) | 10 (62.5) | 4 (80.0)  |
|                   | Female     | 4 (3, 4)                          | 36 (78.3)               | 191 (72.3) | 55 (59.8) | 6 (37.5)  | 1 (20.0)  |
| Ethnicity         | Chinese    | 4 (3, 5)                          | 33 (71.7)               | 204 (77.0) | 76 (82.6) | 15 (93.8) | 4 (80.0)  |
|                   | Malay      | 3 (3, 4)                          | 10 (21.7)               | 26 (9.8)   | 5 (5.4)   | 0 (0.0)   | 1 (20.0)  |
|                   | Indian     | 4 (3, 4)                          | 2 (4.3)                 | 31 (11.7)  | 10 (10.9) | 0 (0.0)   | 0 (0.0)   |
|                   | Others     | 4 (3, 6)                          | 1 (2.2)                 | 4 (1.5)    | 1 (1.1)   | 1 (6.3)   | 0 (0.0)   |
| BMI               | Healthy    | 4 (3, 5)                          | 8 (18.6)                | 50 (19.4)  | 24 (26.4) | 2 (12.5)  | 1 (20.0)  |
|                   | Overweight | 4 (3, 5)                          | 11 (25.6)               | 118 (45.7) | 47 (51.6) | 12 (75.0) | 3 (60.0)  |
|                   | Obesity    | 3 (3, 4)                          | 24 (55.8)               | 90 (34.9)  | 20 (22.0) | 2 (12.5)  | 1 (20.0)  |
| Employment status | Employed   | 4 (3, 4)                          | 21 (46.7)               | 156 (59.3) | 46 (51.7) | 8 (50.0)  | 4 (80.0)  |
|                   | Unemployed | 4 (3, 5)                          | 4 (8.9)                 | 8 (3.0)    | 6 (6.7)   | 1 (6.3)   | 0 (0.0)   |
|                   | Homemaker  | 4 (3, 4)                          | 4 (8.9)                 | 35 (13.3)  | 9 (10.1)  | 0 (0.0)   | 0 (0.0)   |
|                   | Retired    | 4 (3, 5)                          | 16 (35.6)               | 64 (24.3)  | 28 (31.5) | 7 (43.8)  | 1 (20.0)  |
| Education level   | Informal   | 3 (3, 4.5)                        | 3 (6.5)                 | 9 (3.4)    | 4 (4.3)   | 0 (0.0)   | 0 (0.0)   |
|                   | PSLE       | 4 (3, 4)                          | 8 (17.4)                | 43 (16.2)  | 12 (13.0) | 1 (6.3)   | 0 (0.0)   |
|                   | Secondary  | 4 (3, 4)                          | 30 (65.2)               | 134 (50.6) | 44 (47.8) | 5 (31.3)  | 0 (0.0)   |
|                   | Diploma    | 4 (3, 5)                          | 3 (6.5)                 | 38 (14.3)  | 15 (16.3) | 6 (37.5)  | 2 (40.0)  |
|                   | University | 4 (3, 6)                          | 1 (2.2)                 | 29 (10.9)  | 16 (17.4) | 3 (18.8)  | 2 (40.0)  |
|                   | Others     | 3.5 (3, 4)                        | 1 (2.2)                 | 12 (4.5)   | 1 (1.1)   | 1 (6.3)   | 1 (20.0)  |

**Table S2.** Ordinal UCLA activity score and knee osteoarthritis outcome score (KOOS-12)

| <b>Multiple Comparisons</b>       |                                   |                       |            |       |                                                         |         |
|-----------------------------------|-----------------------------------|-----------------------|------------|-------|---------------------------------------------------------|---------|
| Dependent Variable: koos12 score  |                                   |                       |            |       |                                                         |         |
| Bonferroni                        |                                   |                       |            |       |                                                         |         |
| (I) ucla_5cat                     | (J) ucla_5cat                     | Mean Difference (I-J) | Std. Error | Sig.  | 95% Confidence Interval<br>Lower Bound      Upper Bound |         |
| Inactive                          | Low physical activity level       | -3.97246              | 2.49922    | 1.000 | -11.0252                                                | 3.0803  |
|                                   | Moderate physical activity level  | -10.19033*            | 2.82549    | .003  | -18.1638                                                | -2.2169 |
|                                   | High physical activity level      | -8.39554              | 4.54133    | .652  | -21.2111                                                | 4.4200  |
|                                   | Very high physical activity level | -15.24404             | 7.36796    | .392  | -36.0363                                                | 5.5482  |
| Low physical activity level       | Inactive                          | 3.97246               | 2.49922    | 1.000 | -3.0803                                                 | 11.0252 |
|                                   | Moderate physical activity level  | -6.21787*             | 1.89341    | .011  | -11.5610                                                | -.8747  |
|                                   | High physical activity level      | -4.42308              | 4.02807    | 1.000 | -15.7902                                                | 6.9440  |
|                                   | Very high physical activity level | -11.27158             | 7.06318    | 1.000 | -31.2037                                                | 8.6606  |
| Moderate physical activity level  | Inactive                          | 10.19033*             | 2.82549    | .003  | 2.2169                                                  | 18.1638 |
|                                   | Low physical activity level       | 6.21787*              | 1.89341    | .011  | .8747                                                   | 11.5610 |
|                                   | High physical activity level      | 1.79478               | 4.23823    | 1.000 | -10.1654                                                | 13.7550 |
|                                   | Very high physical activity level | -5.05372              | 7.18511    | 1.000 | -25.3299                                                | 15.2225 |
| High physical activity level      | Inactive                          | 8.39554               | 4.54133    | .652  | -4.4200                                                 | 21.2111 |
|                                   | Low physical activity level       | 4.42308               | 4.02807    | 1.000 | -6.9440                                                 | 15.7902 |
|                                   | Moderate physical activity level  | -1.79478              | 4.23823    | 1.000 | -13.7550                                                | 10.1654 |
|                                   | Very high physical activity level | -6.84850              | 8.01661    | 1.000 | -29.4712                                                | 15.7742 |
| Very high physical activity level | Inactive                          | 15.24404              | 7.36796    | .392  | -5.5482                                                 | 36.0363 |
|                                   | Low physical activity level       | 11.27158              | 7.06318    | 1.000 | -8.6606                                                 | 31.2037 |
|                                   | Moderate physical activity level  | 5.05372               | 7.18511    | 1.000 | -15.2225                                                | 25.3299 |
|                                   | High physical activity level      | 6.84850               | 8.01661    | 1.000 | -15.7742                                                | 29.4712 |

\*. The mean difference is significant at the 0.05 level.

**Table S3.** Ordinal UCLA activity score and brief fear of movement (BFOM)

| <b>Multiple Comparisons</b>       |                                   |                       |            |       |                                                         |       |
|-----------------------------------|-----------------------------------|-----------------------|------------|-------|---------------------------------------------------------|-------|
| Dependent Variable: bfom score    |                                   |                       |            |       |                                                         |       |
| Bonferroni                        |                                   |                       |            |       |                                                         |       |
| (I) ucla_5cat                     | (J) ucla_5cat                     | Mean Difference (I-J) | Std. Error | Sig.  | 95% Confidence Interval<br>Lower Bound      Upper Bound |       |
| Inactive                          | Low physical activity level       | 1.773                 | .741       | .174  | -.32                                                    | 3.87  |
|                                   | Moderate physical activity level  | 3.180*                | .921       | .006  | .57                                                     | 5.79  |
|                                   | High physical activity level      | 2.611                 | 1.520      | .869  | -1.69                                                   | 6.91  |
|                                   | Very high physical activity level | 4.389                 | 2.451      | .744  | -2.55                                                   | 11.32 |
| Low physical activity level       | Inactive                          | -1.773                | .741       | .174  | -3.87                                                   | .32   |
|                                   | Moderate physical activity level  | 1.406                 | .689       | .421  | -.54                                                    | 3.36  |
|                                   | High physical activity level      | .838                  | 1.391      | 1.000 | -3.10                                                   | 4.77  |
|                                   | Very high physical activity level | 2.616                 | 2.373      | 1.000 | -4.10                                                   | 9.33  |
| Moderate physical activity level  | Inactive                          | -3.180*               | .921       | .006  | -5.79                                                   | -.57  |
|                                   | Low physical activity level       | -1.406                | .689       | .421  | -3.36                                                   | .54   |
|                                   | High physical activity level      | -.568                 | 1.495      | 1.000 | -4.80                                                   | 3.66  |
|                                   | Very high physical activity level | 1.209                 | 2.435      | 1.000 | -5.68                                                   | 8.10  |
| High physical activity level      | Inactive                          | -2.611                | 1.520      | .869  | -6.91                                                   | 1.69  |
|                                   | Low physical activity level       | -.838                 | 1.391      | 1.000 | -4.77                                                   | 3.10  |
|                                   | Moderate physical activity level  | .568                  | 1.495      | 1.000 | -3.66                                                   | 4.80  |
|                                   | Very high physical activity level | 1.778                 | 2.719      | 1.000 | -5.92                                                   | 9.47  |
| Very high physical activity level | Inactive                          | -4.389                | 2.451      | .744  | -11.32                                                  | 2.55  |
|                                   | Low physical activity level       | -2.616                | 2.373      | 1.000 | -9.33                                                   | 4.10  |
|                                   | Moderate physical activity level  | -1.209                | 2.435      | 1.000 | -8.10                                                   | 5.68  |
|                                   | High physical activity level      | -1.778                | 2.719      | 1.000 | -9.47                                                   | 5.92  |

\*. The mean difference is significant at the 0.05 level.

**Table S4.** Ordinal UCLA activity score and EQ-5D-5L

| <b>Multiple Comparisons</b>          |                                   |                       |            |                         |             |
|--------------------------------------|-----------------------------------|-----------------------|------------|-------------------------|-------------|
| Dependent Variable: eq5d index score |                                   |                       |            |                         |             |
| Dunnett C                            |                                   |                       |            |                         |             |
| (I) ucla_5cat                        | (J) ucla_5cat                     | Mean Difference (I-J) | Std. Error | 95% Confidence Interval |             |
|                                      |                                   |                       |            | Lower Bound             | Upper Bound |
| Inactive                             | Low physical activity level       | -.14361               | .06579     | -.3300                  | .0428       |
|                                      | Moderate physical activity level  | -.24455*              | .06826     | -.4379                  | -.0512      |
|                                      | High physical activity level      | -.18881               | .11246     | -.5274                  | .1497       |
|                                      | Very high physical activity level | -.41743*              | .06679     | -.6188                  | -.2160      |
| Low physical activity level          | Inactive                          | .14361                | .06579     | -.0428                  | .3300       |
|                                      | Moderate physical activity level  | -.10095*              | .03215     | -.1900                  | -.0118      |
|                                      | High physical activity level      | -.04520               | .09499     | -.3373                  | .2469       |
|                                      | Very high physical activity level | -.27383*              | .02890     | -.3817                  | -.1660      |
| Moderate physical activity level     | Inactive                          | .24455*               | .06826     | .0512                   | .4379       |
|                                      | Low physical activity level       | .10095*               | .03215     | .0118                   | .1900       |
|                                      | High physical activity level      | .05574                | .09672     | -.2408                  | .3522       |
|                                      | Very high physical activity level | -.17288*              | .03415     | -.2915                  | -.0543      |
| High physical activity level         | Inactive                          | .18881                | .11246     | -.1497                  | .5274       |
|                                      | Low physical activity level       | .04520                | .09499     | -.2469                  | .3373       |
|                                      | Moderate physical activity level  | -.05574               | .09672     | -.3522                  | .2408       |
|                                      | Very high physical activity level | -.22862               | .09568     | -.5310                  | .0737       |
| Very high physical activity level    | Inactive                          | .41743*               | .06679     | .2160                   | .6188       |
|                                      | Low physical activity level       | .27383*               | .02890     | .1660                   | .3817       |
|                                      | Moderate physical activity level  | .17288*               | .03415     | .0543                   | .2915       |
|                                      | High physical activity level      | .22862                | .09568     | -.0737                  | .5310       |

\*. The mean difference is significant at the 0.05 level.

**Table S5** – Cross tabulation for race and age (Fisher Exact test)

|            | <b>Ethnicity, n (%)</b> |              |               |               | <b>P value</b> |
|------------|-------------------------|--------------|---------------|---------------|----------------|
|            | <b>Chinese</b>          | <b>Malay</b> | <b>Indian</b> | <b>Others</b> |                |
| <b>Age</b> |                         |              |               |               |                |
| ≤ 54       | 38 (11.4)               | 9 (21.4)     | 9 (20.9)      | 1 (14.3)      | 0.002          |
| 55-64      | 135 (40.5)              | 24 (57.1)    | 22 (51.2)     | 4 (57.1)      |                |
| 65-74      | 127 (38.1)              | 7 (16.7)     | 8 (18.6)      | 0 (0.0)       |                |
| ≥75        | 33 (9.91)               | 2 (4.8)      | 4 (9.3)       | 2 (28.6)      |                |

**Table S6** – Cross tabulation for gender and age (Pearson chi-squared test)

|            | <b>Gender, n (%)</b> |               | <b>P value</b> |
|------------|----------------------|---------------|----------------|
|            | <b>Male</b>          | <b>Female</b> |                |
| <b>Age</b> |                      |               |                |
| ≤ 54       | 14 (10.5)            | 43 (14.8)     | 0.105          |
| 55-64      | 56 (41.8)            | 129 (44.5)    |                |
| 65-74      | 45 (33.5)            | 97 (33.5)     |                |
| ≥75        | 19 (14.2)            | 21 (7.2)      |                |
